# Supplementary material for: Thrombospondin-3 augments injury-induced cardiomyopathy by intracellular integrin inhibition and sarcolemmal instability
Source: PubMed Central journal article supplement (PMC6325143; doi:10.1038/s41467-018-08026-8), 2019-01-08
Supplement: 41467_2018_8026_MOESM3_ESM.pdf [file 41467_2018_8026_MOESM3_ESM.pdf]

## Reporting Summary

Nature Research wishes to improve the reproducibility of the work that we publish. This form provides structure for consistency and transparency in reporting. For further information on Nature Research policies, see [Authors & Referees](#) and the [Editorial Policy Checklist](#).

### Statistical parameters

When statistical analyses are reported, confirm that the following items are present in the relevant location (e.g. figure legend, table legend, main text, or Methods section).

n/a Confirmed

- The exact sample size ( $n$ ) for each experimental group/condition, given as a discrete number and unit of measurement
- An indication of whether measurements were taken from distinct samples or whether the same sample was measured repeatedly
- The statistical test(s) used AND whether they are one- or two-sided  
*Only common tests should be described solely by name; describe more complex techniques in the Methods section.*
- A description of all covariates tested
- A description of any assumptions or corrections, such as tests of normality and adjustment for multiple comparisons
- A full description of the statistics including central tendency (e.g. means) or other basic estimates (e.g. regression coefficient) AND variation (e.g. standard deviation) or associated estimates of uncertainty (e.g. confidence intervals)
- For null hypothesis testing, the test statistic (e.g.  $F$ ,  $t$ ,  $r$ ) with confidence intervals, effect sizes, degrees of freedom and  $P$  value noted  
*Give  $P$  values as exact values whenever suitable.*
- For Bayesian analysis, information on the choice of priors and Markov chain Monte Carlo settings
- For hierarchical and complex designs, identification of the appropriate level for tests and full reporting of outcomes
- Estimates of effect sizes (e.g. Cohen's  $d$ , Pearson's  $r$ ), indicating how they were calculated
- Clearly defined error bars  
*State explicitly what error bars represent (e.g. SD, SE, CI)*

*Our web collection on [statistics for biologists](#) may be useful.*

### Software and code

Policy information about [availability of computer code](#)

#### Data collection

Data collection procedures are described in the Method section.  
Software used:  
Gen5 BioTek [www.biotek.com](http://www.biotek.com)  
GraphPad Prism GraphPad Software [www.graphpad.com](http://www.graphpad.com)  
NIS-Elements AR Nikon Instruments [www.nikoninstruments.com](http://www.nikoninstruments.com)  
Leica Application Suite Leica Microsystems [www.leica-microsystems.com](http://www.leica-microsystems.com)  
Ionwizard Ionoptix [www.ionoptix.com](http://www.ionoptix.com)  
Felix 1.1 Horiba [www.horiba.com](http://www.horiba.com)

#### Data analysis

Data analysis procedures are described in the Method section.  
Software used:  
Gen5 BioTek [www.biotek.com](http://www.biotek.com)  
GraphPad Prism GraphPad Software [www.graphpad.com](http://www.graphpad.com)  
NIS-Elements AR Nikon Instruments [www.nikoninstruments.com](http://www.nikoninstruments.com)  
Leica Application Suite Leica Microsystems [www.leica-microsystems.com](http://www.leica-microsystems.com)  
Ionwizard Ionoptix [www.ionoptix.com](http://www.ionoptix.com)

Felix 1.1 Horiba www.horiba.com

For manuscripts utilizing custom algorithms or software that are central to the research but not yet described in published literature, software must be made available to editors/reviewers upon request. We strongly encourage code deposition in a community repository (e.g. GitHub). See the Nature Research [guidelines for submitting code & software](#) for further information.

## Data

Policy information about [availability of data](#)

All manuscripts must include a [data availability statement](#). This statement should provide the following information, where applicable:

- Accession codes, unique identifiers, or web links for publicly available datasets
- A list of figures that have associated raw data
- A description of any restrictions on data availability

Data available on request from the authors

## Field-specific reporting

Please select the best fit for your research. If you are not sure, read the appropriate sections before making your selection.

Life sciences  Behavioural & social sciences  Ecological, evolutionary & environmental sciences

For a reference copy of the document with all sections, see [nature.com/authors/policies/ReportingSummary-flat.pdf](https://nature.com/authors/policies/ReportingSummary-flat.pdf)

## Life sciences study design

All studies must disclose on these points even when the disclosure is negative.

|                 |                                                                                                                                                                                                                                                                                                                                                                                               |
|-----------------|-----------------------------------------------------------------------------------------------------------------------------------------------------------------------------------------------------------------------------------------------------------------------------------------------------------------------------------------------------------------------------------------------|
| Sample size     | The n numbers used in this study reflects the minimum number needed to achieve statistical significance based on experience and previous power analysis. Sample sizes were chosen based on extensive prior experience of the lab in characterizing cardiac injury models in the mouse (including observed post-operative surgical mortality rates for myocardial infarction and TAC surgery). |
| Data exclusions | Mice with pressure gradients of less than 45 mmHg and fractional shortening greater than 30% at 2 weeks post-TAC were excluded from the results, as this indicated an unsuccessful surgery. Animals that did not survive the day of surgery were excluded.                                                                                                                                    |
| Replication     | The results of all in vivo experiments were reproducible as shown across multiple animals (exact n values indicated in the text and figures) over multiple surgical cohorts. In vitro experimental findings were reproduced at least 3 times (exact n values indicated in the text and figures) and replication was successful.                                                               |
| Randomization   | The animals were not randomized because they were genetically identical within groups. Both sexes of mice were used.                                                                                                                                                                                                                                                                          |
| Blinding        | Blinding was performed for some experimental procedures with mice, although blinding was not possible in every instance. Analysis of echocardiographic data, all histological analyses, live cell imaging was performed by investigators blinded to experimental treatment or procedure.                                                                                                      |

## Reporting for specific materials, systems and methods

### Materials & experimental systems

| n/a                                 | Included in the study                                           |
|-------------------------------------|-----------------------------------------------------------------|
| <input type="checkbox"/>            | <input checked="" type="checkbox"/> Unique biological materials |
| <input type="checkbox"/>            | <input checked="" type="checkbox"/> Antibodies                  |
| <input type="checkbox"/>            | <input checked="" type="checkbox"/> Eukaryotic cell lines       |
| <input checked="" type="checkbox"/> | <input type="checkbox"/> Palaeontology                          |
| <input type="checkbox"/>            | <input checked="" type="checkbox"/> Animals and other organisms |
| <input checked="" type="checkbox"/> | <input type="checkbox"/> Human research participants            |

### Methods

| n/a                                 | Included in the study                           |
|-------------------------------------|-------------------------------------------------|
| <input checked="" type="checkbox"/> | <input type="checkbox"/> ChIP-seq               |
| <input checked="" type="checkbox"/> | <input type="checkbox"/> Flow cytometry         |
| <input checked="" type="checkbox"/> | <input type="checkbox"/> MRI-based neuroimaging |

## Unique biological materials

Policy information about [availability of materials](#)

Obtaining unique materials

Obtaining unique materials

pShuttle-CMV-Thbs3-WT  
 pShuttle-CMV-Thbs3-RGD  
 adThbs3-WT  
 adThbs3-RGD

## Antibodies

Antibodies used

rabbit anti Armet Abcam Cat #ab67271  
 rabbit anti ATF6 $\alpha$  Abcam Cat #ab37149  
 rabbit anti calreticulin (CRT) Cell Signaling Technology Cat #2891  
 rabbit anti calnexin (CXN) Abcam Cat #ab75801  
 rabbit anti GRP78/BiP Sigma-Aldrich Cat #G8918  
 rabbit anti PDI Cell Signaling Technology Cat #2446  
 mouse anti PDI Abcam Cat #ab2792  
 rabbit anti integrin  $\alpha$ 10 EMD Millipore Cat #AB6030  
 rabbit anti integrin  $\alpha$ 9 Abcam Cat #ab140599  
 rabbit anti integrin  $\alpha$ 7 Santa Cruz Biotechnology Cat #sc-27706  
 rabbit anti integrin  $\alpha$ 6 Cell Signaling Technology Cat #3750  
 rabbit anti integrin  $\alpha$ 5 EMD Millipore Cat #AB1928  
 rabbit anti integrin  $\alpha$ 4 EMD Millipore Cat #AB1924  
 mouse anti integrin  $\alpha$ 2 Lifespan Biosciences Cat #LS-C159934  
 rabbit anti integrin  $\beta$ 3 Cell Signaling Technology Cat #4702  
 mouse anti Laminin2 Sigma Cat #L0063  
 mouse anti  $\beta$ 1D-integrin EMD Millipore Cat # MAB1900  
 Mouse anti-c-Myc Santa Cruz Biotechnology Cat #sc40  
 mouse anti Thbs1 Lifespan Biosciences Cat #LS-B4155  
 mouse anti Thbs2 BD Bioscience Cat #611150  
 rabbit anti Thbs3 Proteintech Cat #19727-1-AP  
 rabbit anti Thbs4 Santa Cruz Biotechnology Cat #sc-7657  
 rabbit anti COMP (Thbs5) Proteintech Cat #13641-1-AP  
 rabbit pan-cadherin Cell Signaling Technology Cat #4068  
 rabbit anti Sodium Potassium ATPase Cell Signaling Technology Cat #ab76020  
 rabbit anti Cacnac1 Alomone Labs Cat #ACC-022  
 mouse anti  $\beta$ -Tubulin LI-COR Cat #926-42211  
 mouse anti Gapdh Fitzgerald Cat # 10R-G109A  
 goat anti-Mouse IRdye 800CW LI-COR Cat #926-32350  
 goat anti-Rat IRdye 800CW LI-COR Cat #926-32219  
 goat anti-Rabbit IRdye 800CW LI-COR Cat #926-32211  
 goat anti-Mouse IRdye 680RD LI-COR Cat #926-68072  
 goat anti-Rabbit IRdye 680RD LI-COR Cat #925-68073  
 goat anti-Mouse Alexa Fluor-488 ThermoFisher Scientific Cat #A11029  
 goat anti-Rabbit Alexa Fluor-488 ThermoFisher Scientific Cat #A11008  
 goat anti-Mouse Alexa Fluor-568 ThermoFisher Scientific Cat #A11031  
 goat anti-Rabbit Alexa Fluor-568 ThermoFisher Scientific Cat #A11036

Validation

Antibodies were validated by manufacturers, correct molecular weight, correct localization and overexpression or knockout samples whenever possible.

## Eukaryotic cell lines

Policy information about [cell lines](#)

Cell line source(s)

COS-7 cells (ATCC, #CRL-1651)

Authentication

None of the cell lines were authenticated.

Mycoplasma contamination

The cell lines were not tested for mycoplasma contamination.

Commonly misidentified lines  
(See [ICLAC](#) register)

No commonly misidentified lines were used in this study.

## Animals and other organisms

Policy information about [studies involving animals](#); [ARRIVE guidelines](#) recommended for reporting animal research

Laboratory animals

Only laboratory derived mice were used in this study. All experimental procedures with these mice were approved by the Institutional Animal Care and Use Committee of Cincinnati Children's Medical Center, protocols IACUC 2015-0047 and 2016-0069. We have complied with the relevant ethical considerations for animal usage overseen by this committee. The number of mice used in this study reflects the minimum number needed to achieve statistical significance based on experience and previous power analysis. Blinding was performed for some experimental procedures with mice, although blinding was not possible in every instance. Both sexes of mice were used.

Wild animals

No wild animals were used in this study.

Field-collected samples

Study did not involve samples collected in the field.
